# Supplementary material for: Nanopatterning of GeTe phase change films via heated-probe lithography
Source: Royal Society of Chemistry journal article supplement (doi:10.1039/c7nr01482a), 2017-01-01
Supplement: c7nr01482a1.pdf [file c7nr01482a1.pdf]

## Nanopatterning of GeTe Phase Change Films via Heated-Probe Lithography: Supplementary Information

Adrian Podpirka, Woo-Kyung Lee, Jed I. Ziegler, Todd H. Brintlinger, Jonathan R. Felts, Blake S. Simpkins, Nabil D. Bassim, Arnaldo R. Laracuente, Paul E. Sheehan, and Laura B. Ruppalt\*

\*electronic mail: [laura.ruppalt@nrl.navy.mil](mailto:laura.ruppalt@nrl.navy.mil)

Optical constants for the amorphous as-deposited and crystalline GeTe films were extracted from spectral ellipsometry measurements acquired on ~620 nm GeTe films deposited on fused silica. Crystalline films were obtained by annealing as-deposited samples at 250 °C for 10 minutes in an argon atmosphere. A J.A. Woollam spectral ellipsometer (reflection mode) was used to measure the optical properties of the films from ~200 nm to 1700 nm, with subsequent modeling enabling extraction of the index of refraction,  $n$ , and extinction coefficient,  $k$ , of the GeTe as shown in Figure S1, in excellent agreement with previously reported optical properties of similar GeTe films [ref. S1].

The fraction of light transmitted,  $T$ , through a single layer, with constant absorption coefficient,  $\alpha$ , and thickness,  $L$ , is expressed as [ref. S2]

$$T = e^{-\alpha L} \tag{S1}$$

For a system with a position-dependent absorption coefficient, the general form becomes

$$T = e^{\left(-\int \alpha(l) dl\right)} \tag{S2}$$

The system treated in our work consists of two films with a sum total thicknesses of  $L$  and individual thicknesses of  $L*p$  and  $L*(1-p)$ , where  $p$  is the fraction of total film thickness converted from amorphous to crystalline. According to Eq. S2, the absorption of such a stack would then be

$$T = e^{-\{\alpha_c L p + \alpha_a L(1-p)\}} \quad (S4)$$

Given that  $\alpha=4\pi\nu k$ , where  $\nu$  is frequency and  $k$  the extinction coefficient extracted from ellipsometry, one arrives at Eq. 1 as given in the main text:

$$T = e^{-4\pi\nu\{k_c L p + k_a L(1-p)\}} \quad (S5)$$

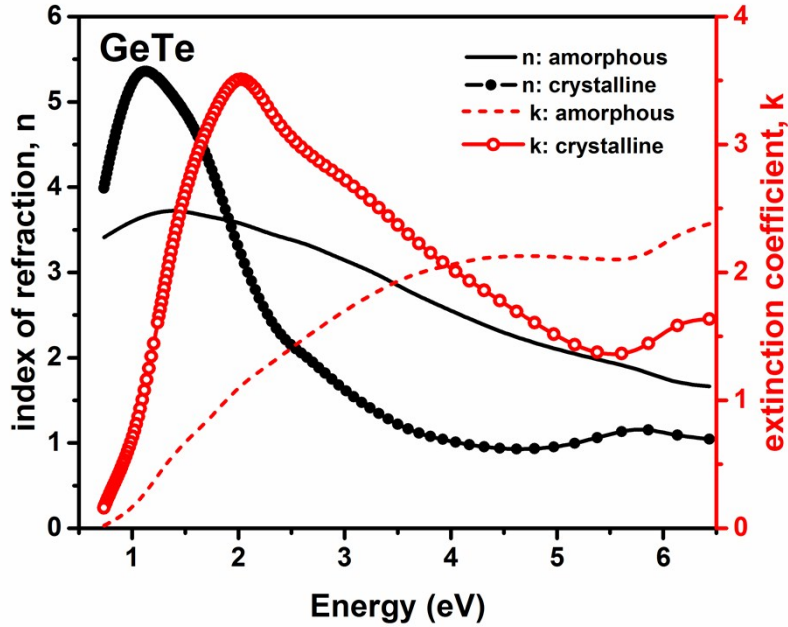

**Figure S1:** GeTe index of refraction,  $n$  (left axis) and extinction coefficient,  $k$  (right axis) extracted from spectral ellipsometry measurements on amorphous and crystalline thin films.

### Supplementary Information References

[S1] Park, J.W.; Baek, S.H.; Kang, T.D.; Lee, H.; Kang, Y.-S.; Lee, T.-Y.; Suh, D.-S.; Kim, K.J.; Kim, C.K.; Khan, Y.H.; Da Silva, J.L.F.; Wei, S.-H., *Applied Physics Letters* **2008**, *93*, 021914

[S2] M. Born and E. Wolf, *Principles of Optics*, Cambridge University Press, UK, 7th edn., 1999, p. 219.
